# Supplementary material
Source: PubMed Central journal article supplement (PMC7500255)
Supplement: NIHMS1026065-supplement-Appendix_A_-_Activities.pdf [file NIHMS1026065-supplement-Appendix_A_-_Activities.pdf]

## Engaging Teenagers in Asynchronous Online Groups to Design for Stress Management

### Appendix A: Activities for teenager group

**Table A.** An outline of weekly 20-minute online activities presented in the study, their purpose, participation, helpfulness ratings, and frequency of interactions between teens (excluding researcher interactions).

| Week | Activity                                                                                                                                                                                                                                                                                                 | Purpose                                                                                                                        | No of participating teens | Average helpfulness rating (n=20)* | Frequency of interactions in Group 1 | Frequency of interactions in Group 2 |
|------|----------------------------------------------------------------------------------------------------------------------------------------------------------------------------------------------------------------------------------------------------------------------------------------------------------|--------------------------------------------------------------------------------------------------------------------------------|---------------------------|------------------------------------|--------------------------------------|--------------------------------------|
| 1    | 1.1. Entry survey – stress response scale and parent adolescent communication scale<br>1.2. Introduction, ice breaker, share a meme on stress                                                                                                                                                            | 1.1. Learn about baseline stress level<br>1.2. Icebreaker to get teens to know each other                                      | 23                        | 3.3 (n=19)                         | 1                                    | 21                                   |
| 2    | React to video on physical manifestations of stress, psychoeducational video                                                                                                                                                                                                                             | Learn about how teens recognize stress and how it affects them.                                                                | 23                        | 3.8 (n=19)                         | 7                                    | 7                                    |
| 3    | Value sorting exercise, activities aligning with values and may also be stressful, and value conflicts                                                                                                                                                                                                   | Learn about activities that are stressful as well as meaningful.                                                               | 22                        | 3.5 (n=20)                         | 0                                    | 0                                    |
| 4    | 4.1. Advice column: Provide advice on scenarios of stress with fictional personas (Family, school, relationship, health, friends, social media/perceptions, self-image)<br>4.2. Provide feedback on others' advice                                                                                       | Technology ideas and eliciting what support they need from tech                                                                | 22                        | 3.6 (n=18)                         | 5                                    | 13                                   |
| 5    | Stress diary with structured prompts (spend 5 minutes for at least 4 days)<br>Each day the prompt changes: write what was stressful, what measures they used to overcome it or how they wished it could have been different/ideal, photo elicitation, write a letter to stress, write a stress checklist | Scaffolding reflection.<br>Data gathering of needs, understanding context, understanding benefits and challenges of journaling | 19                        | 3.9 (n=17)                         | 0                                    | 0                                    |

|    |                                                                                                           |                                                                                                                                                                           |    |            |    |    |
|----|-----------------------------------------------------------------------------------------------------------|---------------------------------------------------------------------------------------------------------------------------------------------------------------------------|----|------------|----|----|
| 6  | Draw your support network map                                                                             | Understanding types of support important to teens (logistical, companionship, informational, emotional support).<br><br>Understanding whom do teens approach for support? | 16 | 3.1 (n=15) | 2  | 1  |
| 7  | Custom diary (free writing at least 4 days of the week)                                                   | Journal about stress, more freedom in reflection                                                                                                                          | 16 | 3.8 (n=16) | 0  | 0  |
| 8  | App feedback (gave them a list of 10 free apps) Teen try one app for 4 days and provide feedback.)        | Feedback on existing features – such as mindfulness, mood tracking, positive restructuring                                                                                | 15 | 4 (n=16)   | 0  | 0  |
| 9  | Teens provide feedback on storyboarded design ideas                                                       | Researchers present storyboards for feedback<br>What support do teens expect from technology to navigate social dynamics to help with stress?                             | 11 | 3.8 (n=16) | 11 | 0  |
| 10 | 10.1. Teens codesign 3 ideas for stress management<br><br>10.2. Teens provide feedback on 2-3 other ideas | Eliciting design ideas from teens                                                                                                                                         | 15 | 4.4 (n=14) | 12 | 5  |
|    | EXIT INTERVIEWS & SURVEY                                                                                  | Obtain feedback on the method and follow up questions on stress management.                                                                                               | 20 | NA         | NA | Na |
|    | Feedback survey on activities                                                                             | Obtain feedback on utility of each online activity and suggestions to make improvements.                                                                                  | 20 | NA         | NA | NA |

\*20 out of 23 participants completed the exit survey to provide ratings on helpfulness of activities. 1= very unhelpful, 5 = very helpful.

### Optional activities

The following two activities were optional to participate in and were available from week 3 through end of the study. There was no compensation associated with these activities.
